# Supplementary material
Source: PubMed Central journal article supplement (PMC11057910)
Supplement: NIHMS1986053-supplement-Supplemental_Data.pdf [file NIHMS1986053-supplement-Supplemental_Data.pdf]

## Supplemental Figures

### Figure S1

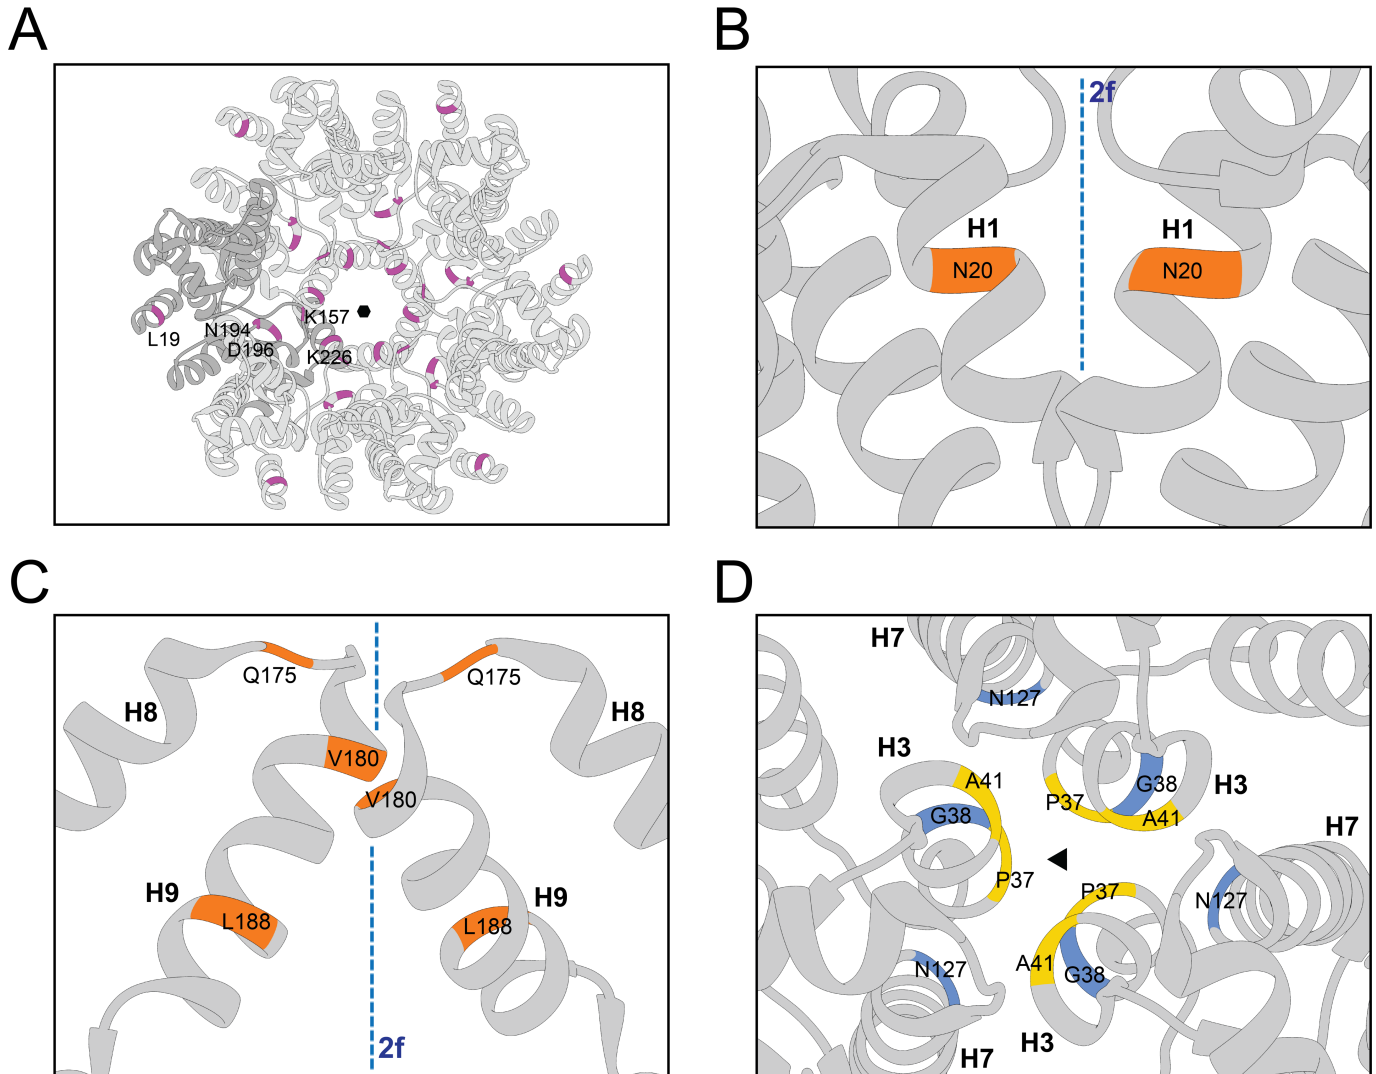

**Figure S1. Mutagenesis sites of the CA hexamer and inter-hexamer interface (related to Fig.1).**

Mutagenesis at intra-hexamer interface (magenta), 2-fold interface (orange), 3-fold interface (blue), and non-conserved residues (yellow). (A) Immature HIV-1 CA hexamer with 5 mutants at the intra-hexamer interfaces. (B) CA<sub>NTD</sub> 2-fold interface (Helix 1). (C) CA<sub>CTD</sub> 2-fold interface (Helix 9). (D) CA 3-fold interface. PDB ID: 5L93.

**Figure S2**

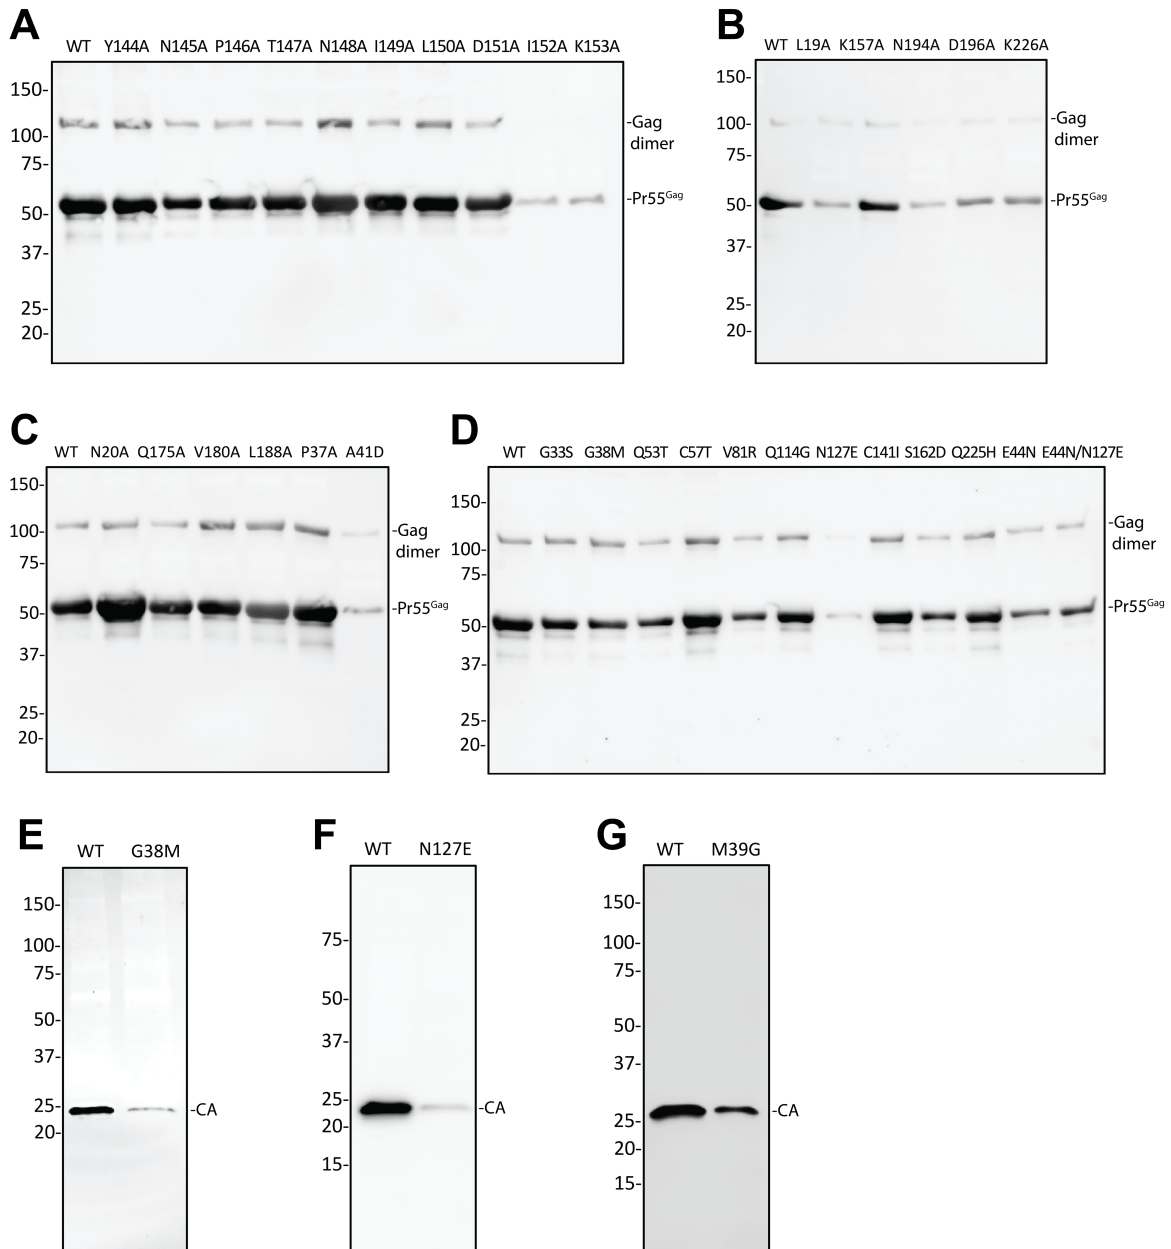

**Figure S2. Immunoblot analysis of particle production for HIV-2 CA mutants.** (A-D) Immature particle production for HIV-2 CA mutants at conserved and non-conserved amino acid residues. The efficiency of immature particle production was analyzed by quantifying Gag proteins with a monoclonal anti-HIV p24 antibody. (E-G) Mature particle production for HIV CA mutants. The efficiency of mature particle production was analyzed by quantifying Gag by detection of the CA (p24) band from cell culture supernatants.
